# Supplementary material for: Porous hydroxyapatite microparticles loaded with 169Er for treatment of chronic inflammatory disease of small joints: harnessing mechanochemistry for synthesis of an advanced biomaterial
Source: Royal Society of Chemistry journal article supplement (doi:10.1039/d5ra09444e), 2026-04-07

## Supporting Information

### **Porous Hydroxyapatite Microparticles Loaded with $^{169}\text{Er}$ for Treatment of Inflamed Small Joints: Harnessing Mechanochemistry for Synthesis of an Advanced Biomaterial**

Sourav Patra,<sup>1,6</sup> K.V. Vimalnath,<sup>1</sup> Srinivasu Kancharlapalli,<sup>2,6</sup> Khajan Singh,<sup>1</sup> Jitendra Bahadur,<sup>3,6</sup> Santosh Kumar Gupta,<sup>4,6</sup> Avik Chakraborty,<sup>5,6</sup> Sudipta Chakraborty,<sup>1,6</sup> and Rubel Chakravarty<sup>1,6,\*</sup>

<sup>1</sup>Radiopharmaceuticals Division, Bhabha Atomic Research Centre, Trombay, Mumbai 400085, India.

<sup>2</sup>Chemistry Division, Bhabha Atomic Research Centre, Trombay, Mumbai 400085, India.

<sup>3</sup>Solid State Physics Division, Bhabha Atomic Research Centre, Trombay, Mumbai 400085, India.

<sup>4</sup>Radiochemistry Division, Bhabha Atomic Research Centre, Trombay, Mumbai 400085, India.

<sup>5</sup>Radiation Medicine Centre, Bhabha Atomic Research Centre, Parel, Mumbai 400012, India

<sup>6</sup>Homi Bhabha National Institute, Anushaktinagar, Mumbai 400094, India.

***\*To whom all correspondences must be addressed:***

Rubel Chakravarty, Ph.D.

E-mail: [rubelc@barc.gov.in](mailto:rubelc@barc.gov.in), [rubelchakravarty@gmail.com](mailto:rubelchakravarty@gmail.com)

**Ex vivo biodistribution study:** For ex vivo biodistribution study, twenty-one healthy Wistar rats (~300 g) were euthanized by CO<sub>2</sub> asphyxiation. Then, 25 μL of 9.25 MBq (~ 0.25 mCi) of [<sup>169</sup>Er]Er-HA MPs was administrated intra-articularly into one of the ankle joint of each rats and they were randomly divided into seven group of three each. Subsequently, the Wistar rats were euthanized at four different time points by CO<sub>2</sub> asphyxiation. After that, different organs and ankle joint were carefully removed and the weight associated to them were measured using a pre-calibrated balance. Then the activity of different organs and ankle joint were measured using NaI(Tl) detector and the dose associated with each organ and ankle joint was expressed in terms of percentage of injected radioactivity dose per gram (%ID/g) of organ/tissue.

The results of the biodistribution study showed excellent retention of injected radiolabeled agent inside the ankle joint cavity. It was observed that the ankle joint uptake of [<sup>169</sup>Er]Er-HA MPs was  $94.5 \pm 4.8$  % at 6 h post injection (p.i.) and significant retention of the radiolabeled formulation was observed even at 120 h p.i., which is desirable for a RSV agent. As expected, a small quantity of radioactive MPs cleared through the hepatobiliary route, with liver uptake of  $0.42 \pm 0.02$  %ID/g at 6 h p.i., which changed to  $0.02 \pm 0.001$  %ID/g at 120 h p.i. time point. The uptake of [<sup>169</sup>Er]Er-HA MPs in any other organ/tissue was also negligible, as evident from the biodistribution pattern.

**Table S1: Determination of sorption capacity of nanoporous HA MPs for  $^{169}\text{Er}$  at different temperatures**

| <b>Batch No</b> | <b>Temperature (°C)</b> | <b>Capacity (mg/g)</b> |
|-----------------|-------------------------|------------------------|
| 1               | 300                     | $110 \pm 5$            |
| 2               | 500                     | $187 \pm 3$            |
| 3               | 700                     | $285 \pm 8$            |
| 4               | 900                     | $282 \pm 5$            |

**Table S2: Production yield of  $^{169}\text{Er}$  from thermal neutron irradiation of 98.2 % enriched  $^{168}\text{Er}$ Er<sub>2</sub>O<sub>3</sub> at 24 h of EOB. The target was irradiated for 21 d at flux of  $1 \times 10^{14} \text{ n cm}^{-2} \text{ s}^{-1}$**

| <b>Batch No</b> | <b>Specific activity<br/>(mCi/mg)</b> | <b>Radionuclidic<br/>impurity (%)</b> | <b>Radiochemical<br/>purity (%)</b> |
|-----------------|---------------------------------------|---------------------------------------|-------------------------------------|
| 1               | $10.1 \pm 1.1$                        | > 99.99                               | > 99.9                              |
| 2               | $10.2 \pm 0.9$                        | > 99.99                               | > 99.9                              |
| 3               | $10.0 \pm 1.1$                        | > 99.99                               | > 99.9                              |
| 4               | $9.9 \pm 0.9$                         | > 99.99                               | > 99.9                              |
| 5               | $9.8 \pm 1.2$                         | > 99.99                               | > 99.9                              |

**Table S3: Determination of sorption capacity of nanoporous HA MPs and its comparison with commercially available bulk HA MPs for the sorption of  $^{169}\text{Er}$**

| Batch No. | Capacity (mg/g)   |             |
|-----------|-------------------|-------------|
|           | Nanoporous HA MPs | Bulk HA MPs |
| 1         | $275 \pm 6$       | $85 \pm 5$  |
| 2         | $272 \pm 5$       | $92 \pm 3$  |
| 3         | $285 \pm 8$       | $99 \pm 4$  |
| 4         | $280 \pm 5$       | $95 \pm 5$  |

**Table S4: Theoretical calculations comparing the requirement for nanoporous HA MPs and commercially available bulk HA MPs for preparation of clinically relevant dose (1 mCi) using  $^{169}\text{Er}$  produced under different irradiation conditions**

| Flux of the reactor<br>( $\text{n cm}^{-2} \text{ s}^{-1}$ ) | Time of irradiation<br>(d) | Specific activity of $^{169}\text{Er}$<br>(mCi/mg) | Requirement of bulk HA<br>(mg) | Requirement of nanoporous HA<br>(mg) |
|--------------------------------------------------------------|----------------------------|----------------------------------------------------|--------------------------------|--------------------------------------|
| $5.0 \times 10^{13}$                                         | 3                          | 0.50                                               | 21.3                           | 7.4                                  |
|                                                              | 5                          | 0.78                                               | 13.7                           | 4.8                                  |
|                                                              | 7                          | 1.02                                               | 10.5                           | 3.6                                  |
|                                                              | 14                         | 1.64                                               | 6.5                            | 2.3                                  |
|                                                              | 21                         | 2.00                                               | 5.3                            | 1.8                                  |
| $1.0 \times 10^{14}$                                         | 3                          | 1.01                                               | 10.6                           | 3.7                                  |
|                                                              | 5                          | 1.57                                               | 6.8                            | 2.4                                  |
|                                                              | 7                          | 2.05                                               | 5.2                            | 1.8                                  |
|                                                              | 14                         | 3.28                                               | 3.2                            | 1.1                                  |
|                                                              | 21                         | 4.01                                               | 2.6                            | 0.9                                  |
| $1.2 \times 10^{14}$                                         | 3                          | 1.21                                               | 8.8                            | 3.1                                  |
|                                                              | 5                          | 1.88                                               | 5.7                            | 2.0                                  |
|                                                              | 7                          | 2.46                                               | 4.3                            | 1.5                                  |
|                                                              | 14                         | 3.94                                               | 2.7                            | 0.9                                  |
|                                                              | 21                         | 4.82                                               | 2.2                            | 0.7                                  |

**Table S5: Comparison of the requirement of bulk HA MPs and nanoporous HA MPs for formulation of ~1 mCi dose of [<sup>169</sup>Er]Er-HA using [<sup>169</sup>Er]ErCl<sub>3</sub> of specific activity ~ 10 mCi/mg. This activity was produced by thermal neutron irradiation in 98.2 % enriched [<sup>168</sup>Er]Er<sub>2</sub>O<sub>3</sub> at a flux  $1 \times 10^{14}$  n cm<sup>-2</sup> s<sup>-1</sup> for 21 d and 24 h of EOB**

| <b>Batch No.</b> | <b>Amount of bulk HA MPs required (mg)</b> | <b>Amount of nanoporous HA MPs required (μg)</b> |
|------------------|--------------------------------------------|--------------------------------------------------|
| 1                | 1.88                                       | 370                                              |
| 2                | 1.90                                       | 372                                              |
| 3                | 1.87                                       | 371                                              |
| 4                | 1.89                                       | 374                                              |

**Figure S1: Images of HA after heating at (a) 300 °C (b) 500 °C (C) 700 °C and (D) 900 °C**

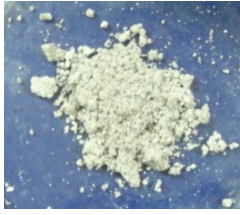

T= 300 °C

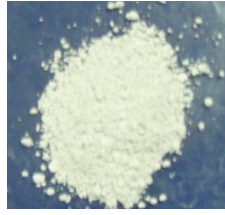

T= 500 °C

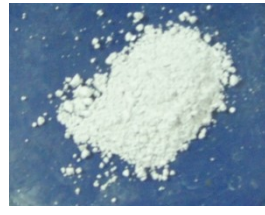

T= 700 °C

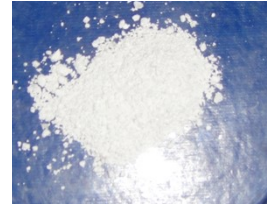

T= 900 °C

**Figure S2: Thermogravimetric analysis (TGA) analysis of synthesized HA MPs**

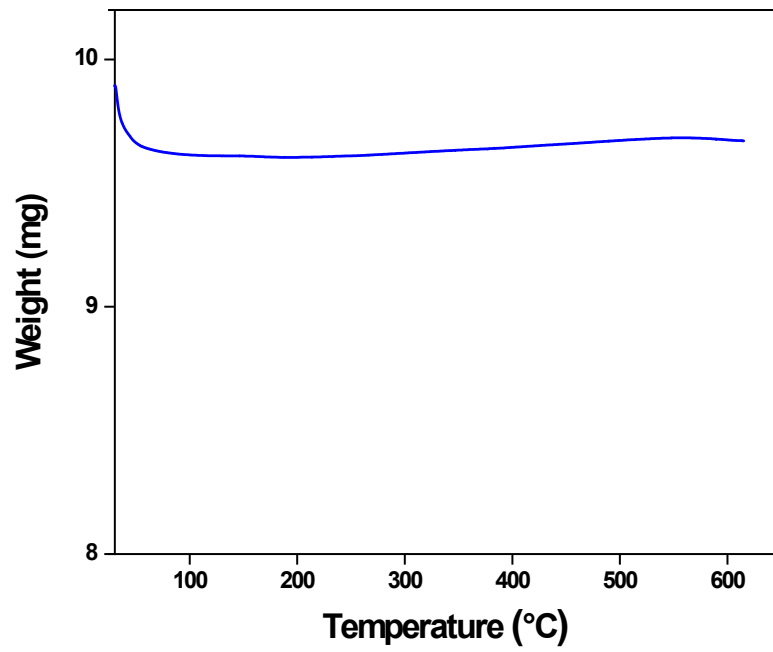

**Figure S3: Variation of sorption capacity of synthesized HA MPs with concentration of  $\text{Er}^{3+}$**

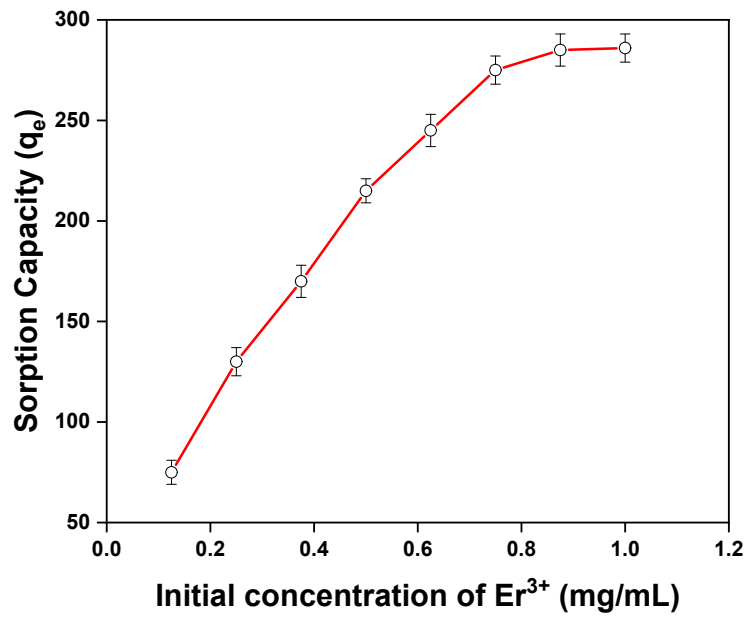

**Figure S4: Particle size distribution of commercially procured bulk HA MPs**

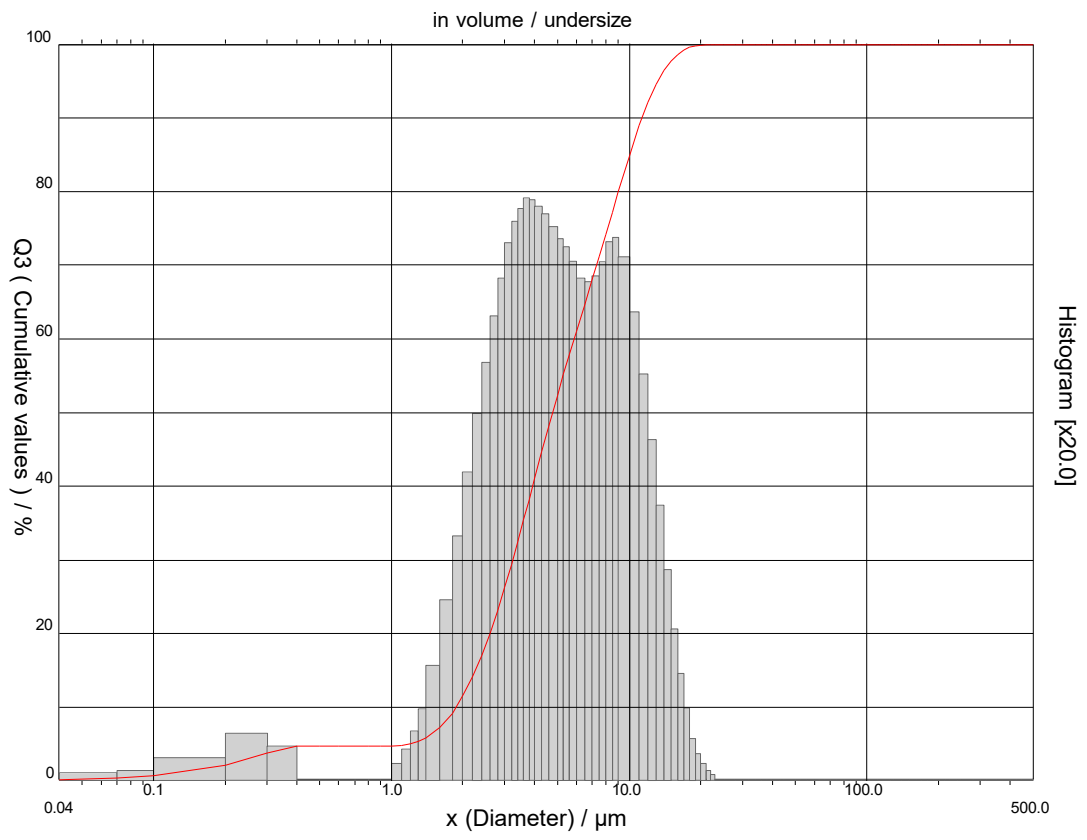

**Figure S5: Variation in sorption capacity of nanoporous HA MPs for Er<sup>3+</sup> with change in the incubation time**

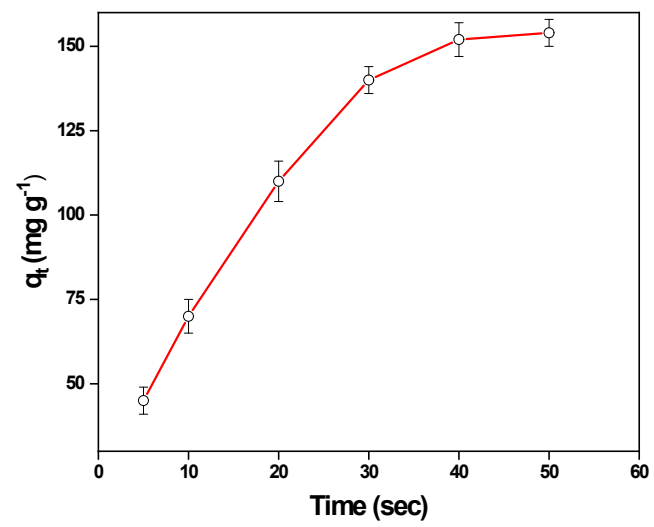

Figure S6: Fitting of the sorption data to the (A) Langmuir isotherm model and (B) Freundlich isotherm model

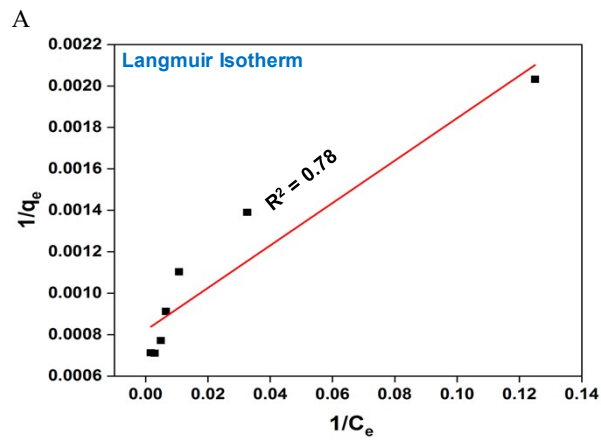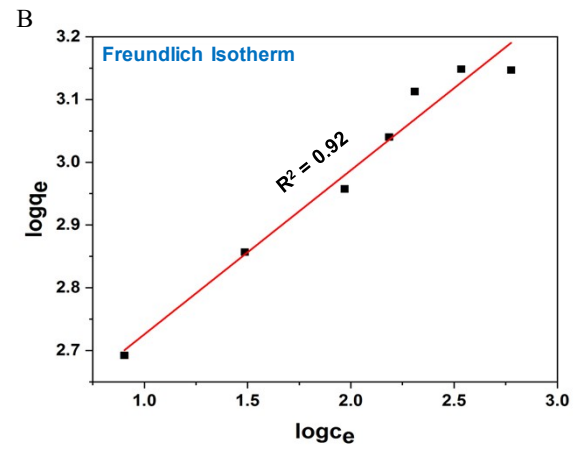

Figure S7: Fitting of the sorption data to the pseudo-first order kinetics model

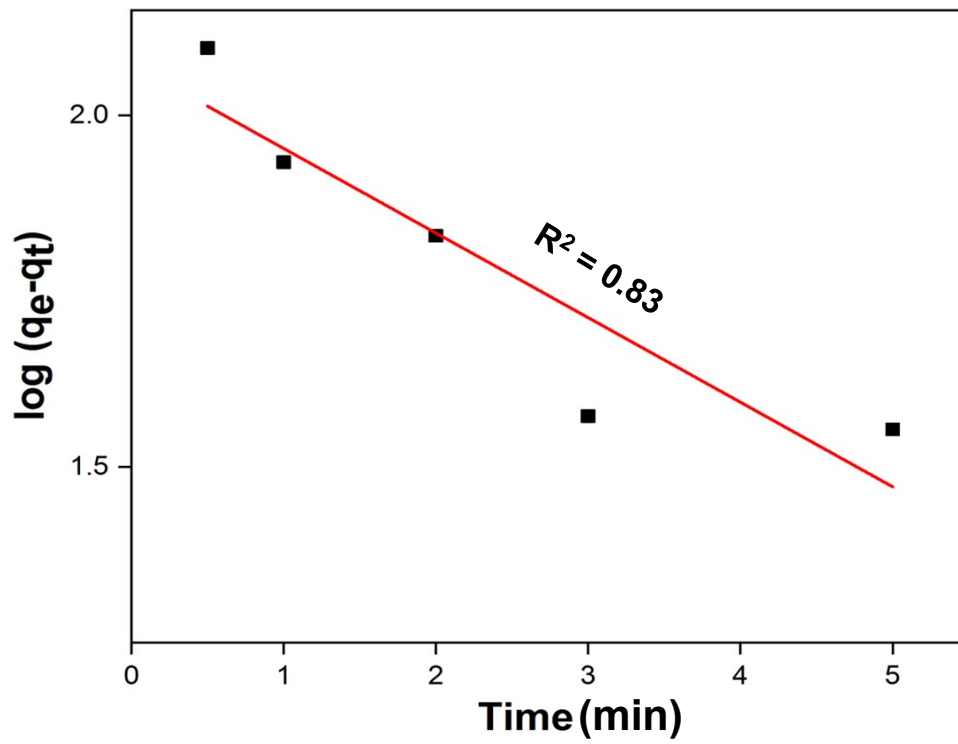

Supplement: d5ra09444e1.pdf [file d5ra09444e1.pdf]
